# Supplementary material
Source: PubMed Central journal article supplement (PMC7897226)
Supplement: NIHMS1634724-supplement-Supp_info.pdf [file NIHMS1634724-supplement-Supp_info.pdf]

**DECIPHERING THE CHE2 CHEMOSENSORY PATHWAY AND THE ROLES OF  
INDIVIDUAL CHE2 PROTEINS FROM *PSEUDOMONAS AERUGINOSA***

**SUPPLEMENTARY INFORMATION**

Emilie Orillard and Kylie J. Watts<sup>#</sup>

Running title: Che2 interactions in *P. aeruginosa*

Division of Microbiology and Molecular Genetics

Loma Linda University

Loma Linda, CA, 92350, USA

<sup>#</sup>*Corresponding author:*

Telephone: +1 (909) 558-1000 x83394

Fax: +1 (909) 558-4035

Email: kwatts@llu.edu

**Table S1.** Bacterial strains, plasmids and genomic libraries used in this study

| Bacterial strains                 | Genotype or description                                                                                                                                 | Reference or source                                      |
|-----------------------------------|---------------------------------------------------------------------------------------------------------------------------------------------------------|----------------------------------------------------------|
| <b><i>P. aeruginosa</i></b>       |                                                                                                                                                         |                                                          |
| PAO1 (mPAO1)                      | WT <i>P. aeruginosa</i>                                                                                                                                 | (Jacobs <i>et al.</i> , 2003, Held <i>et al.</i> , 2012) |
| PW1295 (PAO1 <i>cheB2</i> )       | mPAO1 with transposon ISphoA/hah inserted at nt 218 of PA0173                                                                                           | (Jacobs <i>et al.</i> , 2003, Held <i>et al.</i> , 2012) |
| PW1297 (PAO1 <i>cheD</i> )        | mPAO1 with transposon ISlacZ/hah inserted at nt 28 of PA0174                                                                                            | (Jacobs <i>et al.</i> , 2003, Held <i>et al.</i> , 2012) |
| PW1299 (PAO1 <i>cheR2</i> )       | mPAO1 with transposon ISphoA/hah inserted at nt 109 of PA0175                                                                                           | (Jacobs <i>et al.</i> , 2003, Held <i>et al.</i> , 2012) |
| <b><i>E. coli</i></b>             |                                                                                                                                                         |                                                          |
| BL21(DE3)                         | <i>F- ompT gal dcm lon hsdS<sub>B</sub>(r<sub>B</sub>- m<sub>B</sub>-) (λDE3)</i>                                                                       |                                                          |
| BTH101                            | <i>F- cya-99 araD139 galE15 galK16 rpsL1 (Str<sup>R</sup>) hsdR2 mcrA1 mcrB1</i>                                                                        | Euromedex                                                |
| BT3388                            | <i>tar tsr trg tap aer</i>                                                                                                                              | (Yu <i>et al.</i> , 2002)                                |
| UU2610                            | <i>tar tsr trg tap aer cheR cheB</i>                                                                                                                    | (Zhou <i>et al.</i> , 2011)                              |
| Plasmids                          | Description or construction                                                                                                                             | Reference or source                                      |
| <b><i>P. aeruginosa</i></b>       |                                                                                                                                                         |                                                          |
| pJN105                            | Broad host range plasmid with Gm <sup>R</sup> and <i>araC-P<sub>BAD</sub></i>                                                                           | (Newman & Fuqua, 1999)                                   |
| pJN105-Aer2                       | <i>his-aer2</i> (PA0176) amplified from pLH1 with its RBS and cloned into the EcoRI site of pJN105                                                      | This study                                               |
| <b><i>E. coli</i></b>             |                                                                                                                                                         |                                                          |
| pProEXHTa                         | Plasmid containing Amp <sup>R</sup> , <i>lacI<sup>q</sup></i> , and <i>P<sub>trc</sub></i>                                                              | Invitrogen                                               |
| pLH1 (pProEXHTa-Aer2)             | pProEXHTa expressing full-length His-Aer2 (Aer2 <sup>QEEE</sup> , WT) from <i>P<sub>trc</sub></i>                                                       | (Watts <i>et al.</i> , 2011)                             |
| pProEXHTa-Aer2 <sup>EEEE</sup>    | Q414E was introduced into pLH1 by site-directed mutagenesis to express His-Aer2 <sup>EEEE</sup>                                                         | This study                                               |
| pProEXHTa-Aer2 <sup>QQQQ</sup>    | E421Q, E428Q, and E610Q were sequentially introduced into pLH1 by site-directed mutagenesis to express His-Aer2 <sup>QQQQ</sup>                         | This study                                               |
| pProEXHTa-CheA2                   | CheA2 (PA0178) was amplified from PAO1 DNA and cloned into the NcoI and HindIII sites of pProEXHTa to express His-CheA2                                 | This study                                               |
| pProEXHTa-CheY2                   | CheY2 (PA0179) was amplified from PAO1 DNA and cloned into the NcoI and HindIII sites of pProEXHTa to express His-CheY2                                 | This study                                               |
| pProEXHTa-CheY2-D10K              | D10K was introduced into pProEXHTa-CheY2 by site-directed mutagenesis to express His-CheY2-D10K                                                         | This study                                               |
| pProEXHTa-CheY                    | CheY (PA1456) was amplified from PAO1 DNA and cloned into the NcoI and HindIII sites of pProEXHTa to express His-CheY                                   | This study                                               |
| pProEXHTa- <i>Ec</i> CheA         | CheA was amplified from <i>E. coli</i> BT3388 DNA and cloned into the NcoI and HindIII sites of pProEXHTa to express His- <i>Ec</i> CheA                | This study                                               |
| pProEXHTa-CheD                    | CheD (PA0174) was amplified from PAO1 DNA and cloned into the NcoI and HindIII sites of pProEXHTa to express His-CheD                                   | This study                                               |
| pProEXHTa-Aer2 <sup>380-679</sup> | pProEXHTa expressing His-Aer2 <sup>380-679</sup>                                                                                                        | (Watts <i>et al.</i> , 2011)                             |
| pProEXHTa-Aer <sup>260-521</sup>  | Aer <sup>260-521</sup> (PA1561) was amplified from PAO1 DNA and cloned into the BamHI and Sall sites of pProEXHTa to express His-Aer <sup>260-521</sup> | This study                                               |

|                                   |                                                                                                                                                                                         |                                     |
|-----------------------------------|-----------------------------------------------------------------------------------------------------------------------------------------------------------------------------------------|-------------------------------------|
| pProEXHTa-CtpM <sub>300-561</sub> | CtpM <sub>300-561</sub> (PA2652) was amplified from PAO1 DNA and cloned into the EcoRI and NotI sites of pProEXHTa to express His-CtpM <sub>300-561</sub>                               | This study                          |
| pVSCheY-6H                        | Amp <sup>R</sup> and <i>lacI<sup>q</sup></i> plasmid expressing <i>E. coli</i> CheY-His                                                                                                 | (Miller <i>et al.</i> , 2006)       |
| pKG116                            | Plasmid with Cam <sup>R</sup> and <i>P<sub>nahG</sub></i>                                                                                                                               | (Buron-Barral <i>et al.</i> , 2006) |
| pKG116-CheB2                      | CheB2 (PA0173) was amplified from PAO1 DNA and cloned into the NdeI and BamHI sites of pKG116 to express His-CheB2                                                                      | This study                          |
| pKG116-CheD                       | CheD (PA0174) was amplified from PAO1 DNA and cloned into the NdeI and BamHI sites of pKG116 to express His-CheD                                                                        | This study                          |
| pKG116-CheD-V41T                  | V41T was introduced into pKG116-CheD by site-directed mutagenesis to express His-CheD-V41T                                                                                              | This study                          |
| pKG116-CheR2                      | CheR2 (PA0175) was amplified from PAO1 DNA and cloned into the NdeI and BamHI sites of pKG116 to express His-CheR2                                                                      | This study                          |
| pKG116-CheDB2                     | CheDB2 was amplified from PAO1 DNA and cloned into the NdeI and BamHI sites of pKG116 to express His-CheD and CheB2                                                                     | This study                          |
| pKG116-CheR2D                     | CheR2D was amplified from PAO1 DNA and cloned into the NdeI and BamHI sites of pKG116 to express His-CheR2 and CheD                                                                     | This study                          |
| pKG116-CheR2DB2                   | CheR2DB2 was amplified from PAO1 DNA and cloned into the NdeI and BamHI sites of pKG116 to express His-CheR2, CheD and CheB2                                                            | This study                          |
| pKG116-CheR1                      | CheR1 (PA3348) was amplified from PAO1 DNA and cloned into the NdeI and EcoRI sites of pKG116 to express His-CheR1                                                                      | This study                          |
| pKG116-CheR1D                     | CheR1 and CheD were each amplified from PAO1 DNA and cloned into the NdeI and BamHI sites of pKG116 with an EcoRI/linker (11 nts) in between in order to express His-CheR1 and His-CheD | This study                          |
| pKT25                             | Km <sup>R</sup> plasmid with <i>P<sub>lac</sub></i> encoding the T25 fragment of <i>B. pertussis cyaA</i> and a downstream MCS                                                          | Euromedex                           |
| pKT25-CheA2                       | CheA2 (PA0178) was amplified from PAO1 DNA and cloned into the XbaI and EcoRI sites of pKT25 to express T25-CheA2                                                                       | This study                          |
| pKT25-CheY2                       | CheY2 (PA0179) was amplified from PAO1 DNA and cloned into the XbaI and EcoRI sites of pKT25 to express T25-CheY2                                                                       | This study                          |
| pKT25-CheY2-D10K                  | D10K was introduced into pKT25-CheY2 by site-directed mutagenesis to express T25-CheY2-D10K                                                                                             | This study                          |
| pKT25-CheY2/CheA2                 | <i>his-cheA2</i> was amplified from pProEXHTa-CheA2 with its <i>P<sub>trc</sub></i> promoter and cloned into the HindIII site of pKT25-CheY2 to express T25-CheY2 and His-CheA2         | This study                          |
| pKT25-CheY2-D10K/CheA2            | D10K was introduced into pKT25-CheY2/CheA2 by site-directed mutagenesis to express T25-CheY2-D10K and His-CheA2                                                                         | This study                          |
| pKT25-CheR2                       | CheR2 (PA0175) was amplified from pKG116-CheR2 and cloned into the XbaI and EcoRI sites of pKT25 to express T25-CheR2                                                                   | This study                          |
| pKNT25                            | Km <sup>R</sup> plasmid with <i>P<sub>lac</sub></i> containing a MCS upstream of the T25 fragment of <i>B. pertussis cyaA</i>                                                           | Euromedex                           |
| pKNT25-CheY2                      | CheY2 (PA0179) was amplified from PAO1 DNA and cloned into the HindIII and XbaI sites of pKNT25 to express CheY2-T25                                                                    | This study                          |

|                             |                                                                                                                                                                                  |               |
|-----------------------------|----------------------------------------------------------------------------------------------------------------------------------------------------------------------------------|---------------|
| pKNT25-CheY2-D10K           | D10K was introduced into pKNT25-CheY2 by site-directed mutagenesis to express CheY2-D10K-T25                                                                                     | This study    |
| pKNT25-CheY2/CheA2          | <i>his-cheA2</i> was amplified from pProEXHTa-CheA2 with its <i>P<sub>trc</sub></i> promoter and cloned into the HindIII site of pKNT25-CheY2 to express CheY2-T25 and His-CheA2 | This study    |
| pKNT25-CheY                 | CheY (PA1456) was amplified from PAO1 DNA and cloned into the HindIII and XbaI sites of pKNT25 to express CheY-T25                                                               | This study    |
| pUT18                       | Amp <sup>R</sup> plasmid with <i>P<sub>lac</sub></i> containing a MCS upstream of the T18 fragment of <i>B. pertussis cyaA</i>                                                   | Euromedex     |
| pUT18-CheA2                 | CheA2 (PA0178) was amplified from PAO1 DNA and cloned into the XbaI and EcoRI sites of pUT18 to express CheA2-T18                                                                | This study    |
| pUT18-CheD                  | Full-length CheD (PA0174, nts encoding res. 1-200) was amplified from PAO1 DNA and cloned into the XbaI and EcoRI sites of pUT18 to express CheD-T18                             | This study    |
| pUT18-CheD <sub>1-182</sub> | CheD [nts encoding res. 1-182] was amplified by inverse PCR of pUT18-CheD and ligated at EcoRI to express CheD <sub>1-182</sub> -T18                                             | This study    |
| pUT18-CheD <sub>1-167</sub> | CheD [nts encoding res. 1-167] was amplified by inverse PCR of pUT18-CheD and ligated at EcoRI to express CheD <sub>1-167</sub> -T18                                             | This study    |
| pUT18C                      | Amp <sup>R</sup> plasmid with <i>P<sub>lac</sub></i> encoding the T18 fragment of <i>B. pertussis cyaA</i> and a downstream MCS                                                  | Euromedex     |
| pUT18C-CheA2                | CheA2 (PA0178) was amplified from PAO1 DNA and cloned into the XbaI and EcoRI sites of pUT18C to express T18-CheA2                                                               | This study    |
| pUT18C- <i>Ec</i> CheA      | CheA was amplified from <i>E. coli</i> BT3388 DNA and cloned into the PstI and BamHI sites of pUT18C to express T18- <i>Ec</i> CheA                                              | This study    |
| pUT18C-FliM                 | FliM (PA1443) was amplified from PAO1 DNA and cloned into the XbaI and EcoRI sites of pUT18C to express T18-FliM                                                                 | This study    |
| pUT18C-CheD                 | CheD (PA0174) was amplified from PAO1 DNA and cloned into the XbaI and EcoRI sites of pUT18C to express T18-CheD                                                                 | This study    |
| <b>PAO1 libraries</b>       | <b>Description</b>                                                                                                                                                               | <b>Source</b> |
| pUT18-PAO1lib               | pUT18 containing a PAO1 genomic library as an N-terminal fusion to T18 (see methods for details)                                                                                 | This study    |
| pUT18C-PAO1lib              | pUT18C containing a PAO1 genomic library as C-terminal fusion to T18 (see methods for details)                                                                                   | This study    |

**Table S2.** Summary of *P. aeruginosa* PAO1 gDNA library screens with CheY2

| Screen                                                                  | Co-transformants                        | Red clones               | Red after restreaking | CheY2 partners     |
|-------------------------------------------------------------------------|-----------------------------------------|--------------------------|-----------------------|--------------------|
| pKT25-CheY2/CheA2 +<br>pUT18-PAO1lib<br>pUT18C-PAO1lib<br><b>total</b>  | 391, 500<br>342, 100<br><b>733, 600</b> | 79<br>258<br><b>337</b>  | 22<br>11<br><b>33</b> | -<br>2<br><b>2</b> |
| pKNT25-CheY2/CheA2 +<br>pUT18-PAO1lib<br>pUT18C-PAO1lib<br><b>total</b> | 216, 808<br>39, 680<br><b>256, 488</b>  | 108<br>153<br><b>261</b> | 30<br>1<br><b>31</b>  | -<br>-<br>-        |
| pKT25-CheY2-D10K +<br>pUT18-PAO1lib<br>pUT18C-PAO1lib<br><b>total</b>   | 31, 560<br>355, 840<br><b>387, 400</b>  | 2<br>304<br><b>306</b>   | -<br>17<br><b>17</b>  | -<br>-<br>-        |

## References

- Buron-Barral, M.D.C., K.K. Gosink & J.S. Parkinson, (2006) Loss- and gain-of-function mutations in the F1-HAMP region of the *Escherichia coli* aerotaxis transducer Aer. *J Bacteriol* **188**: 3477-3486.
- Held, K., E. Ramage, M. Jacobs, L. Gallagher & C. Manoil, (2012) Sequence-verified two-allele transposon mutant library for *Pseudomonas aeruginosa* PAO1. *J Bacteriol* **194**: 6387-6389.
- Jacobs, M.A., A. Alwood, I. Thaipisuttikul, D. Spencer, E. Haugen, S. Ernst, O. Will, R. Kaul, C. Raymond, R. Levy, L. Chun-Rong, D. Guenther, D. Bovee, M.V. Olson & C. Manoil, (2003) Comprehensive transposon mutant library of *Pseudomonas aeruginosa*. *Proc Natl Acad Sci U S A* **100**: 14339-14344.
- Miller, A.S., S.C. Kohout, K.A. Gilman & J.J. Falke, (2006) CheA kinase of bacterial chemotaxis: chemical mapping of four essential docking sites. *Biochemistry* **45**: 8699-8711.
- Newman, J.R. & C. Fuqua, (1999) Broad-host-range expression vectors that carry the L-arabinose-inducible *Escherichia coli* araBAD promoter and the araC regulator. *Gene* **227**: 197-203.
- Watts, K.J., B.L. Taylor & M.S. Johnson, (2011) PAS/poly-HAMP signalling in Aer-2, a soluble haem-based sensor. *Mol Microbiol* **79**: 686-699.
- Yu, H.S., J.H. Saw, S. Hou, R.W. Larsen, K.J. Watts, M.S. Johnson, M.A. Zimmer, G.W. Ordal, B.L. Taylor & M. Alam, (2002) Aerotactic responses in bacteria to photoreleased oxygen. *FEMS Microbiol Lett* **217**: 237-242.
- Zhou, Q., P. Ames & J.S. Parkinson, (2011) Biphasic control logic of HAMP domain signalling in the *Escherichia coli* serine chemoreceptor. *Mol Microbiol* **80**: 596-611.
